# Supplementary material for: A Straightforward Access to New Amides of the Melanin Precursor 5,6-Dihydroxyindole-2-carboxylic Acid and Characterization of the Properties of the Pigments Thereof
Source: MDPI journal article supplement (doi:10.3390/molecules27154816), 2022-07-27
Supplement: s1 [file s1]

# Supporting information

## A straightforward access to new amides of the melanin precursor 5,6-dihydroxyindole-2-carboxylic acid and characterization of the properties of the pigments thereof

| Table of contents                                                                                                                                                       |       |
|-------------------------------------------------------------------------------------------------------------------------------------------------------------------------|-------|
| <b>Figure S1.</b> HPLC profile of the amidation reaction of DAICA at 10 min after addition of HATU ( $\lambda = 300$ nm).                                               | p. 1  |
| <b>Figure S2.</b> HPLC profile of the course of the amidation reaction at 5 minutes after addition of 1-butanamine ( $\lambda = 300$ nm).                               | p. 2  |
| <b>Figure S3.</b> HPLC profile of DAICA butanamide after purification ( $\lambda = 300$ nm).                                                                            | p. 3  |
| <b>Figure S4.</b> $^1\text{H}$ NMR spectrum of <i>N</i> -butane-5,6-diacetoxy-1 <i>H</i> -indole-2-carboxamide ( <b>1</b> ) (DMSO- $\text{d}_6$ ).                      | p. 4  |
| <b>Figure S5.</b> $^{13}\text{C}$ NMR spectrum of <i>N</i> -butane-5,6-diacetoxy-1 <i>H</i> -indole-2-carboxamide ( <b>1</b> ) (DMSO- $\text{d}_6$ ).                   | p. 5  |
| <b>Table S1.</b> NMR spectral data (ppm) for <b>1</b> . Resonance assignment based on 2D NMR analysis                                                                   | p. 6  |
| <b>Figure S6.</b> $^1\text{H}$ NMR spectrum <i>N,N'</i> -(butane-1,4-diyl)bis(5,6-diacetoxy-1 <i>H</i> -indole-2-carboxamide) ( <b>2</b> ) (DMSO- $\text{d}_6$ ).       | p. 7  |
| <b>Figure S7.</b> $^{13}\text{C}$ NMR spectrum <i>N,N'</i> -(butane-1,4-diyl)bis(5,6-diacetoxy-1 <i>H</i> -indole-2-carboxamide) ( <b>2</b> ) (DMSO- $\text{d}_6$ ).    | p. 8  |
| <b>Table S2.</b> NMR spectral data (ppm) for <b>2</b> . Resonance assignment based on 2D NMR analysis                                                                   | p. 9  |
| <b>Figure S8.</b> $^1\text{H}$ NMR spectrum of <i>N,N'</i> -(hexane-1,6-diyl)bis(5,6-diacetoxy-1 <i>H</i> -indole-2-carboxamide) ( <b>3</b> ) (DMSO- $\text{d}_6$ ).    | p. 10 |
| <b>Figure S9.</b> $^{13}\text{C}$ NMR spectrum of <i>N,N'</i> -(hexane-1,6-diyl)bis(5,6-diacetoxy-1 <i>H</i> -indole-2-carboxamide) ( <b>3</b> ) (DMSO- $\text{d}_6$ ). | p. 11 |
| <b>Table S3.</b> NMR spectral data (ppm) for <b>3</b> . Resonance assignment based on 2D NMR analysis                                                                   | p. 12 |
| <b>Figure S10.</b> $^1\text{H}$ NMR spectrum of 5,6-diacetoxy- <i>N</i> -phenyl-1 <i>H</i> -indole-2-carboxamide of DHICA ( <b>4</b> ) (DMSO- $\text{d}_6$ ).           | p. 13 |
| <b>Figure S11.</b> $^{13}\text{C}$ NMR spectrum of 5,6-diacetoxy- <i>N</i> -phenyl-1 <i>H</i> -indole-2-carboxamide of DHICA ( <b>4</b> ) (DMSO- $\text{d}_6$ ).        | p. 14 |
| <b>Table S4.</b> NMR spectral data (ppm) for <b>4</b> . Resonance assignment based on 2D NMR analysis                                                                   | p. 15 |
| <b>Figure S12.</b> Chromatogram of deacetylated <b>1</b> ( $\lambda = 300$ nm).                                                                                         | p. 16 |
| <b>Figure S13.</b> $^1\text{H}$ NMR spectrum of deacetylated <b>1</b> (DMSO- $\text{d}_6$ ).                                                                            | p. 17 |
| <b>Figure S14.</b> UV-Vis spectrophotometric monitoring of the course of the aerial oxidation of DHICA carboxamides over time.                                          | p. 18 |
| <b>Figure S15.</b> Digital photos of pigments as obtained from DHICA carboxamides in carbonate buffer at pH 9 after 24 h under stirring.                                | p. 19 |
| <b>Figure S16.</b> UV-vis spectrum prior and after filtration of the ethanol solution (1 mg/mL) of carboxamides and DHICA.                                              | p. 20 |

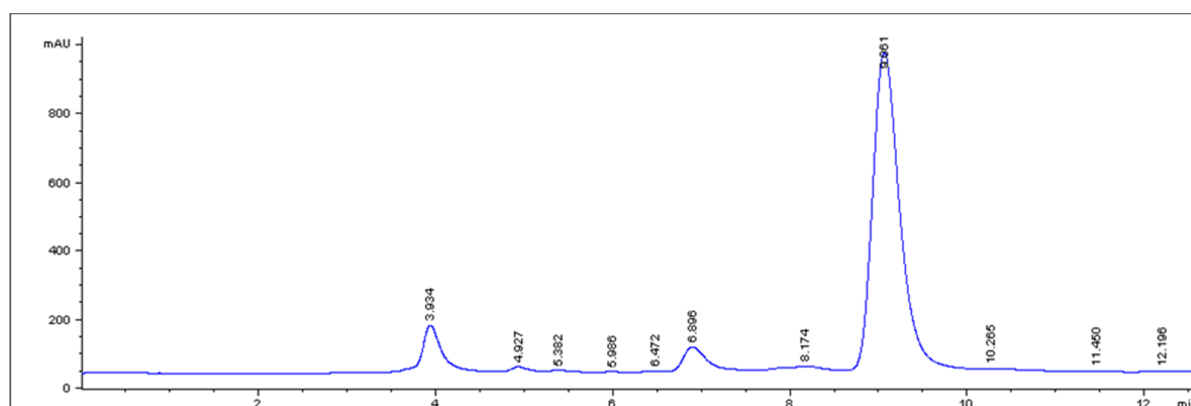

Figure

**S1.** HPLC profile of the amidation reaction of DAICA at 10 min after addition of HATU ( $\lambda = 300$  nm).

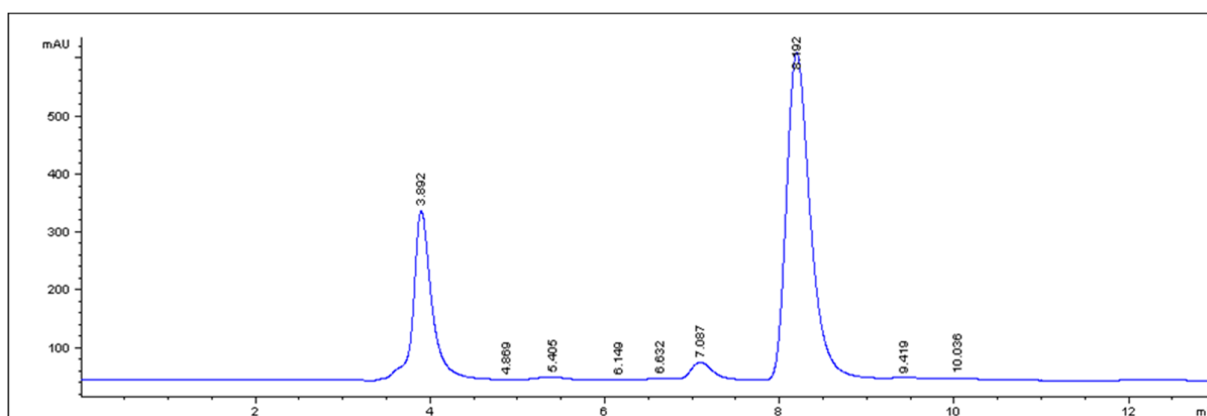

Figure

**S2.** Chromatogram of the course of the amidation reaction at 5 minutes after addition of 1-butanamine ( $\lambda = 300$  nm).

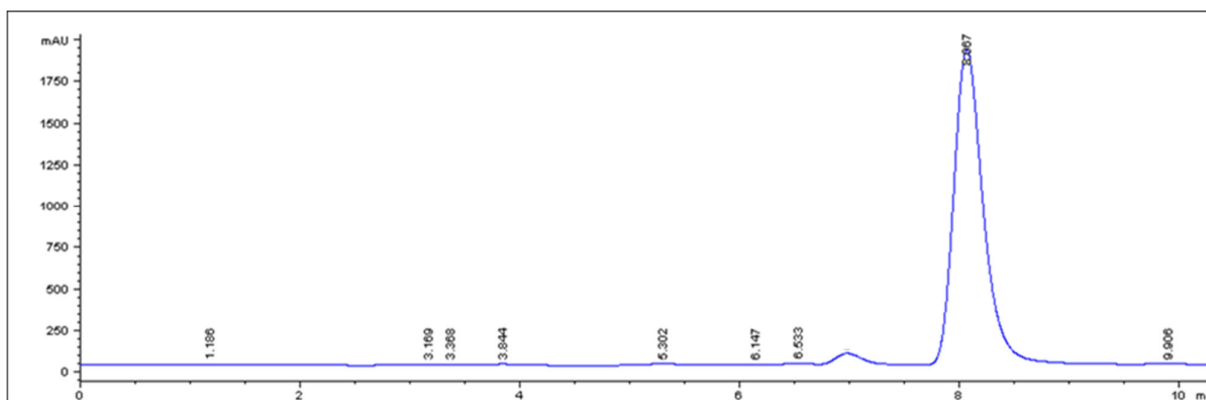

**Figure S3.** HPLC profile of DAICA butanamide after purification ( $\lambda = 300$  nm).

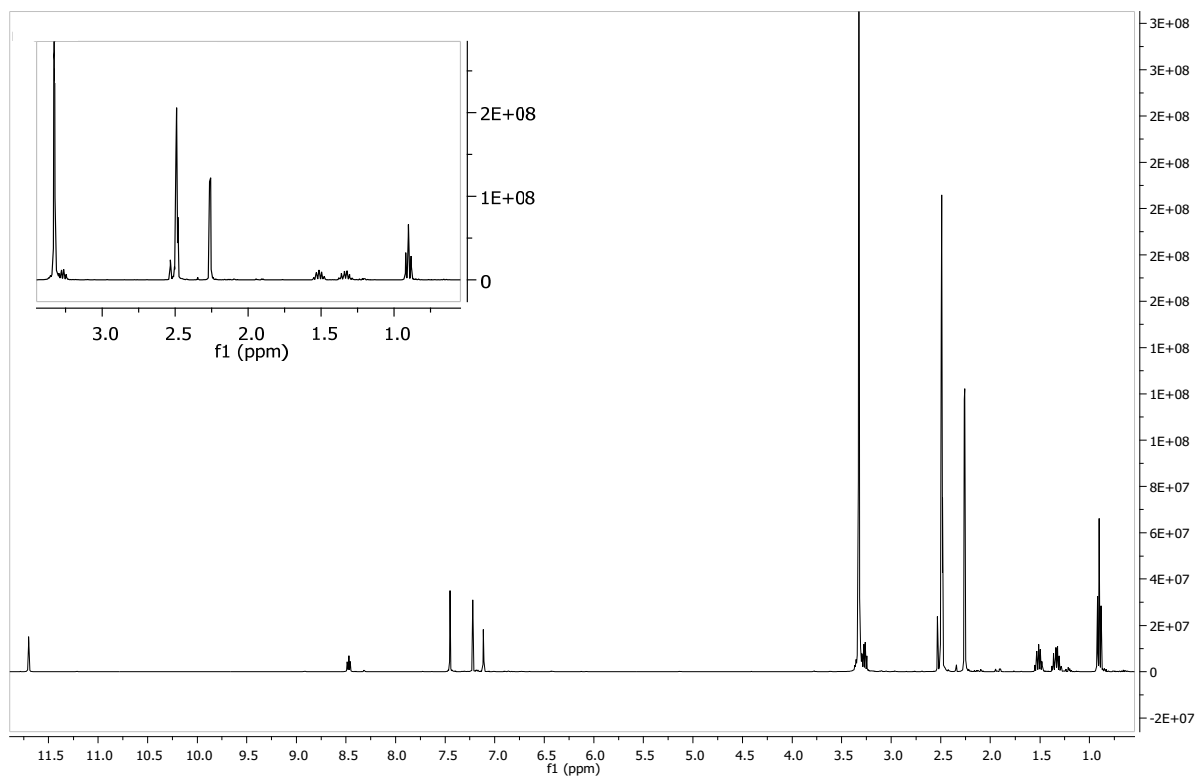

**Figure S4.**  $^1\text{H}$  NMR spectrum of *N*-butane-5,6-diacetoxy-1*H*-indole-2-carboxamide (1) ( $\text{DMSO-d}_6$ ).

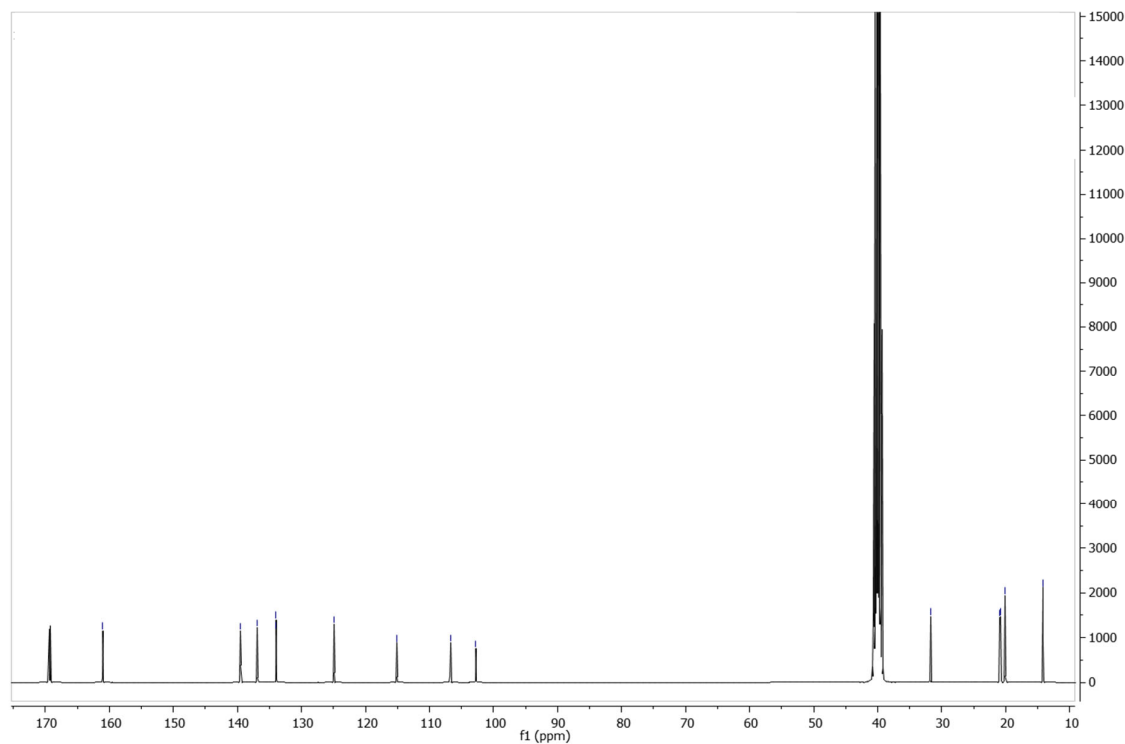

**Figure S5.**  $^{13}\text{C}$  NMR spectrum of *N*-butane-5,6-diacetoxy-1*H*-indole-2-carboxamide (1) ( $\text{DMSO-d}_6$ ).

**Table S1.** NMR spectral data (ppm) for **1**\*.

|                                                                           | <sup>1</sup> H (J, Hz) | <sup>13</sup> C |
|---------------------------------------------------------------------------|------------------------|-----------------|
| <u>CH</u> <sub>3</sub> CH <sub>2</sub> CH <sub>2</sub> CH <sub>2</sub> NH | 0.90(t,7.2)            | 14.3            |
| CH <sub>3</sub> <u>CH</u> <sub>2</sub> CH <sub>2</sub> CH <sub>2</sub> NH | 1.33(s,7.2)            | 20.1            |
| CH <sub>3</sub> CH <sub>2</sub> <u>CH</u> <sub>2</sub> CH <sub>2</sub> NH | 1.51(quint, 7.6)       | 31.8            |
| <u>CH</u> <sub>3</sub> COO-5 indole                                       | 2.25(s)                | 20.8            |
| <u>CH</u> <sub>3</sub> COO-6 indole                                       | 2.26(s)                | 20.9            |
| CH <sub>3</sub> CH <sub>2</sub> CH <sub>2</sub> <u>CH</u> <sub>2</sub> NH | 3.21(m)                | 39.3            |
| <u>CH</u> -3 indole                                                       | 7.14(dd, 0.8, 2.0)     | 102.8           |
| <u>CH</u> -4 indole                                                       | 7.45(d, 0.8)           | 106.7           |
| <u>CH</u> -7 indole                                                       | 7.21(bs)               | 115.2           |
| CH <sub>2</sub> <u>NH</u> CO                                              | 8.47(t,5.8)            |                 |
| <u>NH</u> indole                                                          | 11.74(bs)              |                 |
| <u>C</u> 9 indole                                                         |                        | 124.9           |
| <u>C</u> 2 indole                                                         |                        | 133.9           |
| <u>C</u> 8 indole                                                         |                        | 134.0           |
| <u>C</u> 6 indole                                                         |                        | 136.9           |
| <u>C</u> 5 indole                                                         |                        | 139.5           |
| NHCO                                                                      |                        | 161.0           |
| CH <sub>3</sub> <u>COO</u> -5 indole                                      |                        | 169.2           |
| CH <sub>3</sub> <u>COO</u> -6 indole                                      |                        | 169.3           |

\*Resonance assignment based on 2D NMR spectra (not shown).

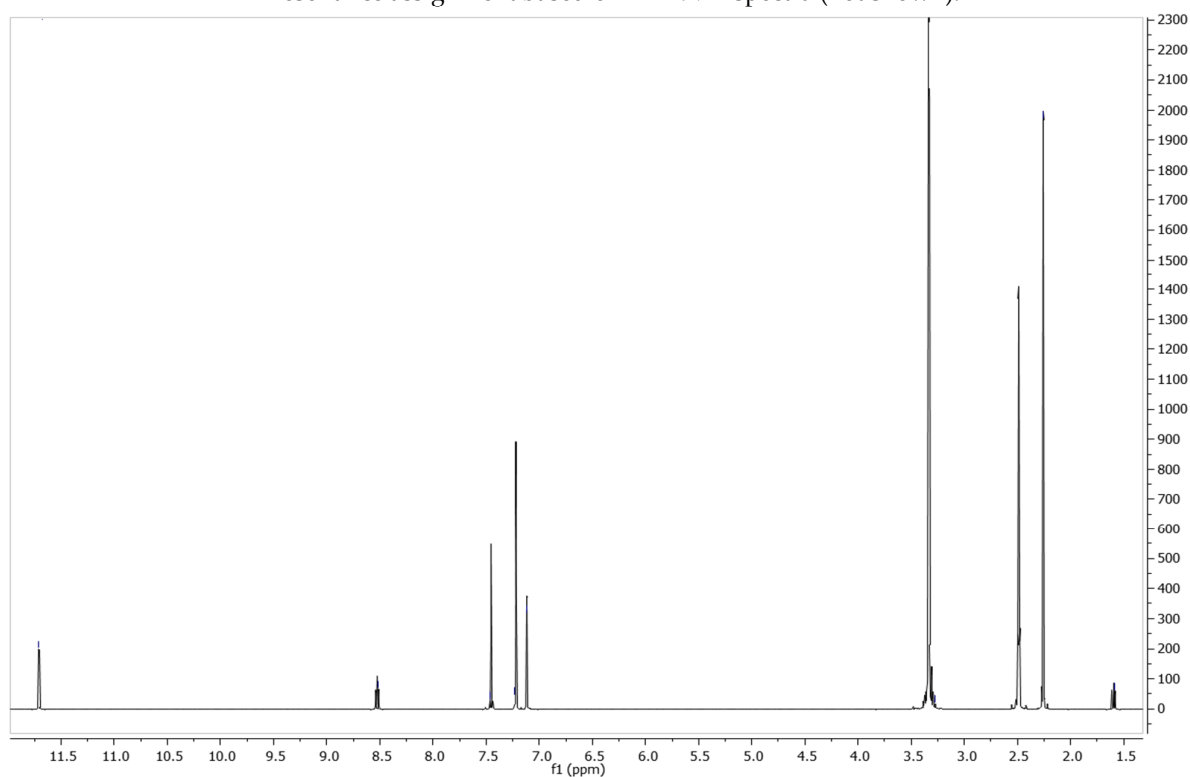

**Figure S6.** <sup>1</sup>H NMR spectrum *N,N'*-(butane-1,4-diyl)bis(5,6-diacetoxy-1*H*-indole-2-carboxamide) (**2**) (DMSO-*d*<sub>6</sub>).

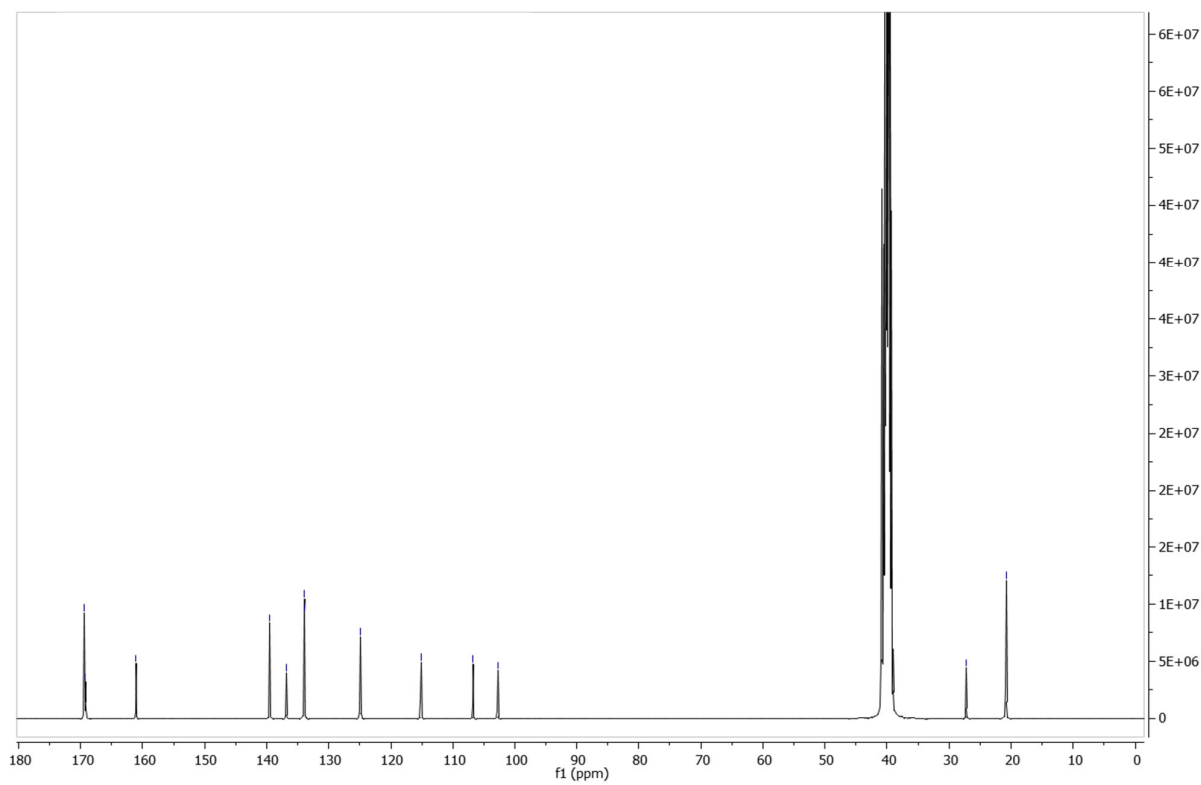

**Figure S7.**  $^{13}\text{C}$  NMR spectrum  $N,N'$ -(butane-1,4-diyl)bis(5,6-diacetoxy-1H-indole-2-carboxamide) (**2**) (DMSO- $\text{d}_6$ ).

**Table S2.** NMR spectral data (ppm) for **2**.

|                                                           | $^1\text{H}$ (J, Hz) | $^{13}\text{C}$ |
|-----------------------------------------------------------|----------------------|-----------------|
| $\text{NHCH}_2\text{CH}_2\text{CH}_2\text{CH}_2\text{NH}$ | 1.58(t,8.0)          | 27.2            |
| $\text{CH}_3\text{COO}$ -5 indole                         | 2.25(s)              | 20.8            |
| $\text{CH}_3\text{COO}$ -6 indole                         | 2.26(s)              | 20.9            |
| $\text{NHCH}_2\text{CH}_2\text{CH}_2\text{CH}_2\text{NH}$ | 3.32(m)              | 39.8            |
| $\text{CH-3}$ indole                                      | 7.12(dd, 0.8, 2.4)   | 102.8           |
| $\text{CH-4}$ indole                                      | 7.45(d, 0.8)         | 106.7           |
| $\text{CH-7}$ indole                                      | 7.21(bs)             | 115.2           |
| $\text{CH}_2\text{NHCO}$                                  | 8.51(t,6.0)          |                 |
| $\text{NH}$ indole                                        | 11.72(bs)            |                 |
| $\text{C9}$ indole                                        |                      | 124.9           |
| $\text{C2}$ indole                                        |                      | 133.9           |
| $\text{C8}$ indole                                        |                      | 134.0           |
| $\text{C6}$ indole                                        |                      | 136.9           |
| $\text{C5}$ indole                                        |                      | 139.5           |
| $\text{NHCO}$                                             |                      | 161.0           |
| $\text{CH}_3\text{COO}$ -5 indole                         |                      | 169.2           |
| $\text{CH}_3\text{COO}$ -6 indole                         |                      | 169.4           |

\*Resonance assignment based on 2D NMR spectra (not shown)

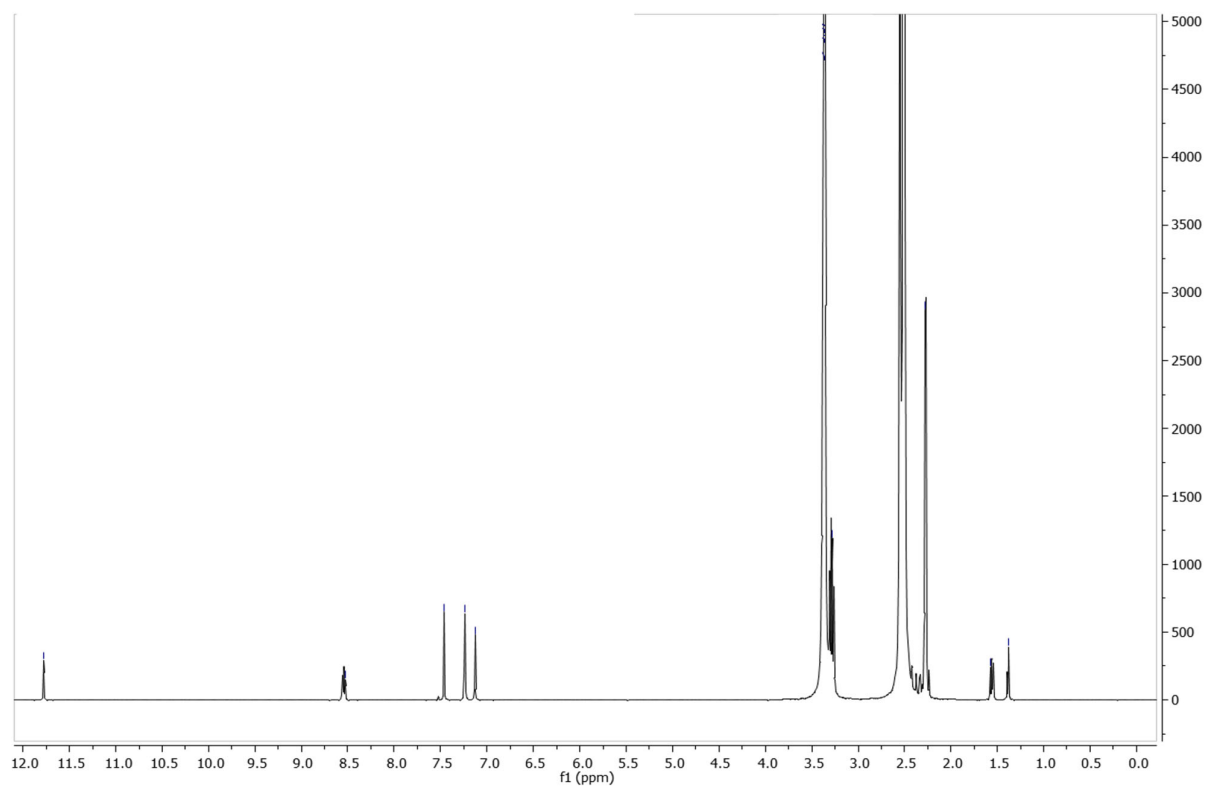

**Figure S8.** <sup>1</sup>H NMR spectrum of *N,N'*-(hexane-1,6-diyl)bis(5,6-diacetoxy-1*H*-indole-2-carboxamide) (**3**) (DMSO-*d*<sub>6</sub>).

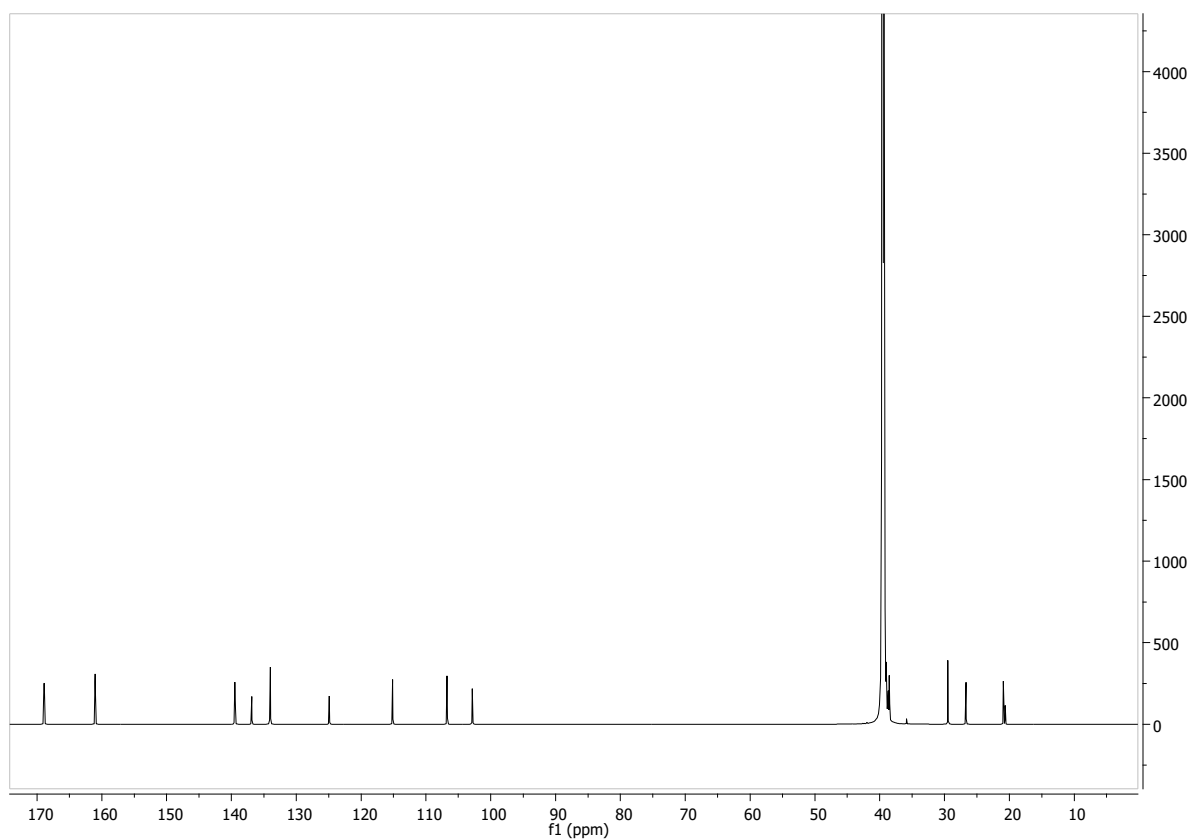

**Figure S9.**  $^{13}\text{C}$  NMR spectrum of *N,N'*-(hexane-1,6-diyl)bis(5,6-diacetoxy-1*H*-indole-2-carboxamide) (**3**) ( $\text{DMSO}-d_6$ ).

**Table S3.** NMR spectral data (ppm) for **3**.

|                                                                                 | $^1\text{H}$ (J, Hz) | $^{13}\text{C}$ |
|---------------------------------------------------------------------------------|----------------------|-----------------|
| $\text{NHCH}_2\text{CH}_2\text{CH}_2\text{CH}_2\text{CH}_2\text{CH}_2\text{NH}$ | 1.37(m)              | 26.7            |
| $\text{NHCH}_2\text{CH}_2\text{CH}_2\text{CH}_2\text{CH}_2\text{CH}_2\text{NH}$ | 1.56(m)              | 29.6            |
| $\text{CH}_3\text{COO}$ -5 indole                                               | 2.25(s)              | 20.8            |
| $\text{CH}_3\text{COO}$ -6 indole                                               | 2.26(s)              | 20.9            |
| $\text{NHCH}_2\text{CH}_2\text{CH}_2\text{CH}_2\text{CH}_2\text{CH}_2\text{NH}$ | 3.32(m)              | 39.3            |
| $\text{CH}$ -3 indole                                                           | 7.12(bs)             | 102.8           |
| $\text{CH}$ -4 indole                                                           | 7.45(bs)             | 106.5           |
| $\text{CH}$ -7 indole                                                           | 7.22(bs)             | 115.2           |
| $\text{CH}_2\text{NHCO}$                                                        | 8.51(t,6)            |                 |
| $\text{NH}$ indole                                                              | 11.72(bs)            |                 |
| $\text{C}$ 9 indole                                                             |                      | 124.9           |
| $\text{C}$ 2 indole                                                             |                      | 133.9           |
| $\text{C}$ 8 indole                                                             |                      | 134.0           |
| $\text{C}$ 6 indole                                                             |                      | 136.8           |
| $\text{C}$ 5 indole                                                             |                      | 139.3           |
| $\text{NHCO}$                                                                   |                      | 161.0           |
| $\text{CH}_3\text{COO}$ -5 indole                                               |                      | 169.2           |
| $\text{CH}_3\text{COO}$ -6 indole                                               |                      | 169.4           |

\*Resonance assignment based on 2D NMR spectra (not shown)

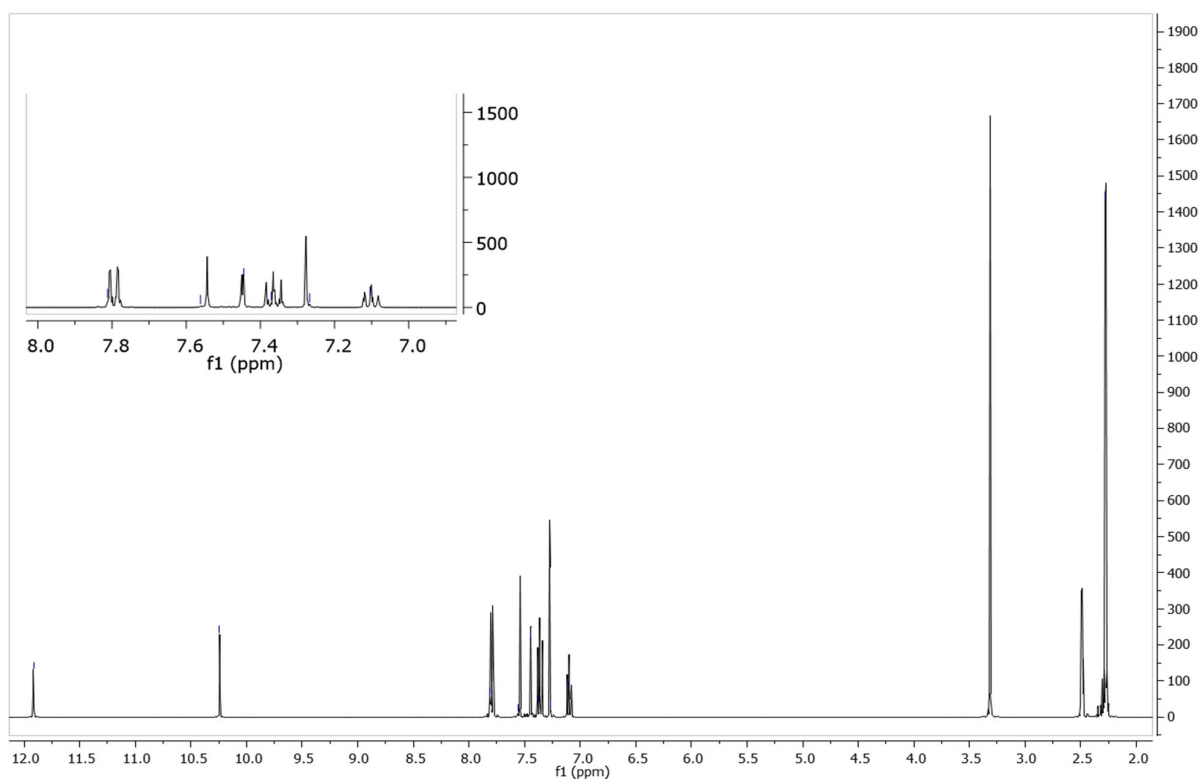

**Figure S10.** <sup>1</sup>H NMR spectrum of 5,6-diacetoxy-*N*-phenyl-1*H*-indole-2-carboxamide of DHICA (**4**) (DMSO-*d*<sub>6</sub>).

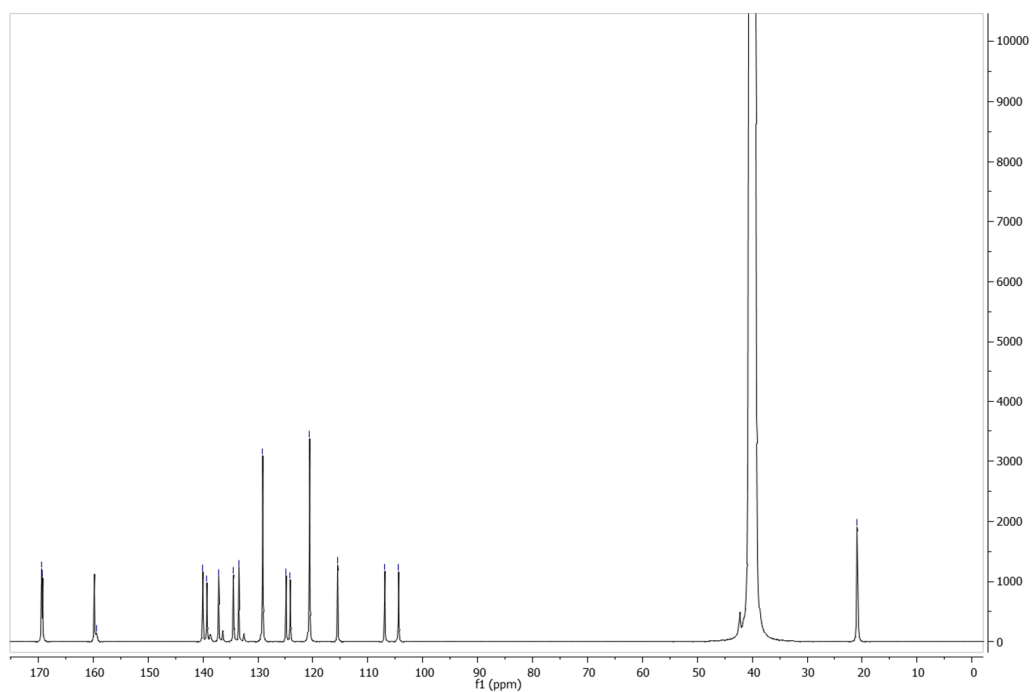

**Figure S11.** <sup>13</sup>C NMR spectrum of 5,6-diacetoxy-*N*-phenyl-1*H*-indole-2-carboxamide of DHICA (**4**) (DMSO-*d*<sub>6</sub>).



**Table S4.** NMR spectral data (ppm) for **4**.

|                                      | <sup>1</sup> H (J, Hz) | <sup>13</sup> C |
|--------------------------------------|------------------------|-----------------|
| <u>CH</u> <sub>3</sub> COO-5 indole  | 2.27(s)                | 20.8            |
| <u>CH</u> <sub>3</sub> COO-6 indole  | 2.28(s)                | 20.9            |
| <u>CH</u> -aniline                   | 7.10(t,8.0)            | 124.1           |
| <u>CH</u> -7 indole                  | 7.27(t,0.8)            | 106.8           |
| <u>CH</u> -aniline                   | 7.37(t,8.0)            | 120.6           |
| <u>CH</u> -3 indole                  | 7.44(dd, 2.4,0.8)      | 104.4           |
| <u>CH</u> -4 indole                  | 7.55(bs)               | 115.4           |
| <u>CH</u> -aniline                   | 7.88(d,2.0)            | 129.2           |
| aniline <u>NH</u> CO                 | 10.24(s)               |                 |
| <u>NH</u> indole                     | 11.92(bs)              |                 |
| <u>C</u> 9 indole                    |                        | 124.5           |
| <u>C</u> 2 indole                    |                        | 133.4           |
| <u>C</u> 8 indole                    |                        | 134.5           |
| <u>C</u> 6 indole                    |                        | 137.1           |
| <u>C</u> 5 indole                    |                        | 139.3           |
| <u>C</u> -aniline                    |                        | 140.0           |
| <u>NH</u> CO                         |                        | 159.9           |
| CH <sub>3</sub> <u>C</u> OO-5 indole |                        | 169.2           |
| CH <sub>3</sub> <u>C</u> OO-6 indole |                        | 169.4           |

\*Resonance assignment based on 2D NMR spectra (not shown)

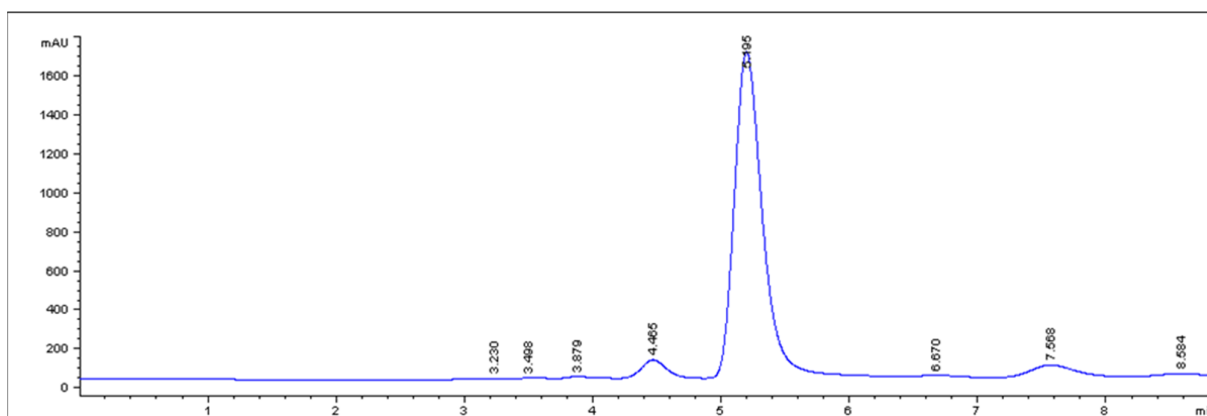

**Figure S12.** Chromatogram of deacetylated **1** ( $\lambda = 300$  nm).

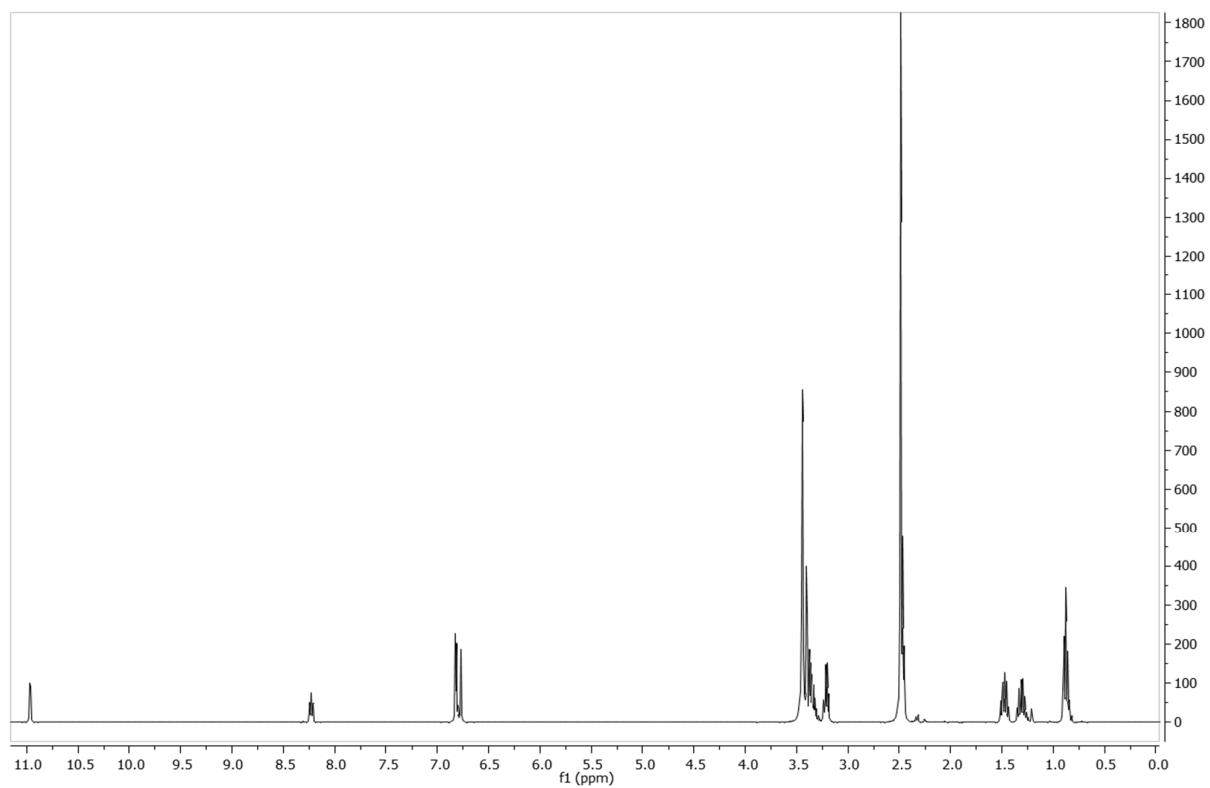

**Figure S13.**  $^1\text{H}$  NMR spectrum of deacetylated **1** ( $\text{DMSO-d}_6$ ).

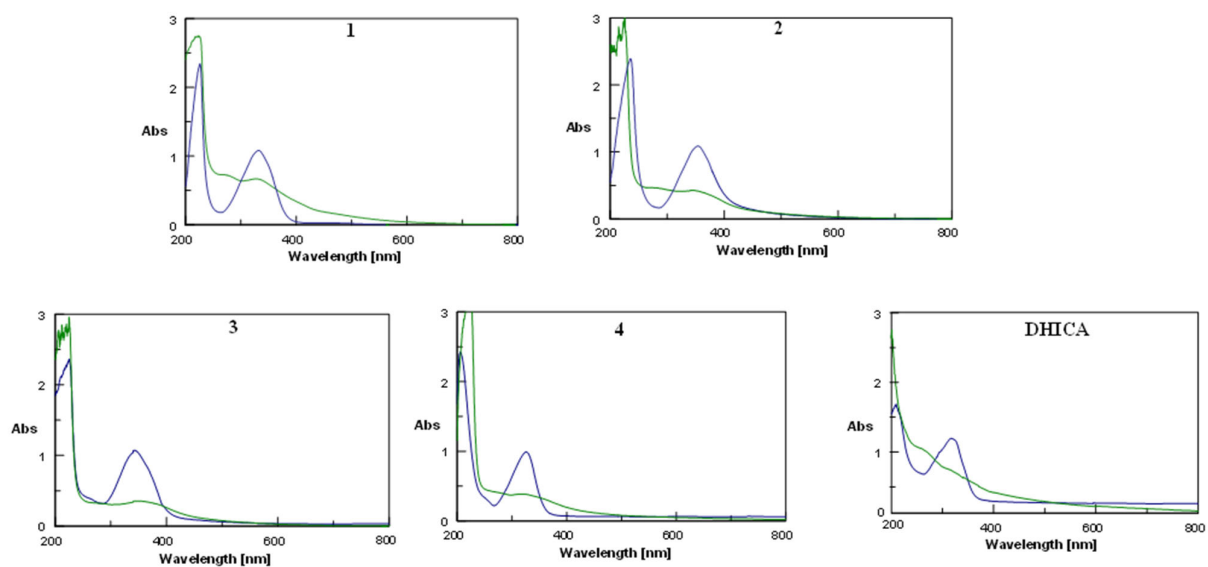

**Figure S14.** UV-Vis spectrophotometric monitoring of the course of the aerial oxidation of DHICA carboxyamides at t 0 h (blue), t24 h (green).

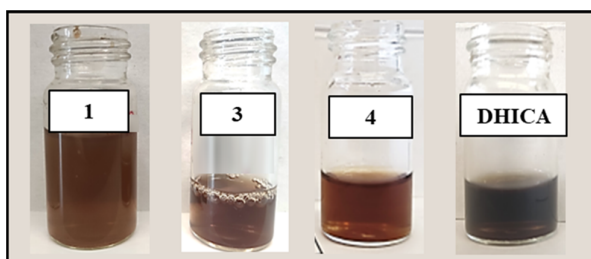

**Figure S15.** Digital photos of pigments as obtained from DHICA carboxyamides in carbonate buffer at pH 9 after 24 h under stirring.

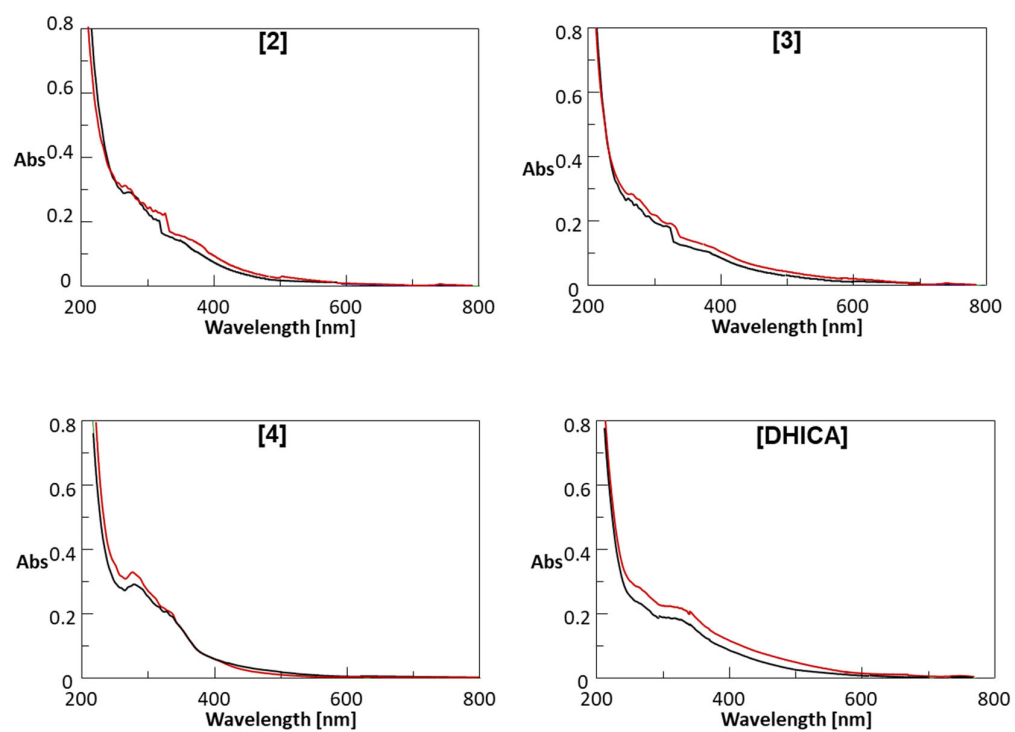

**Figure S16.** UV-vis spectrum prior and after filtration of the ethanol solution (1mg/mL) of carbox-amides and DHICA.
